# Supplementary figures and images for: A Randomized, Double-Blind Evaluation of d-Cycloserine or Alprazolam Combined With Virtual Reality Exposure Therapy for Posttraumatic Stress Disorder in Iraq and Afghanistan War Veterans
Source: Atypon-hosted journal article supplement (doi:10.1176/appi.ajp.2014.13121625), 2014-04-18

# Supplemental Figure 1

## DCS Iraq-Consort Table

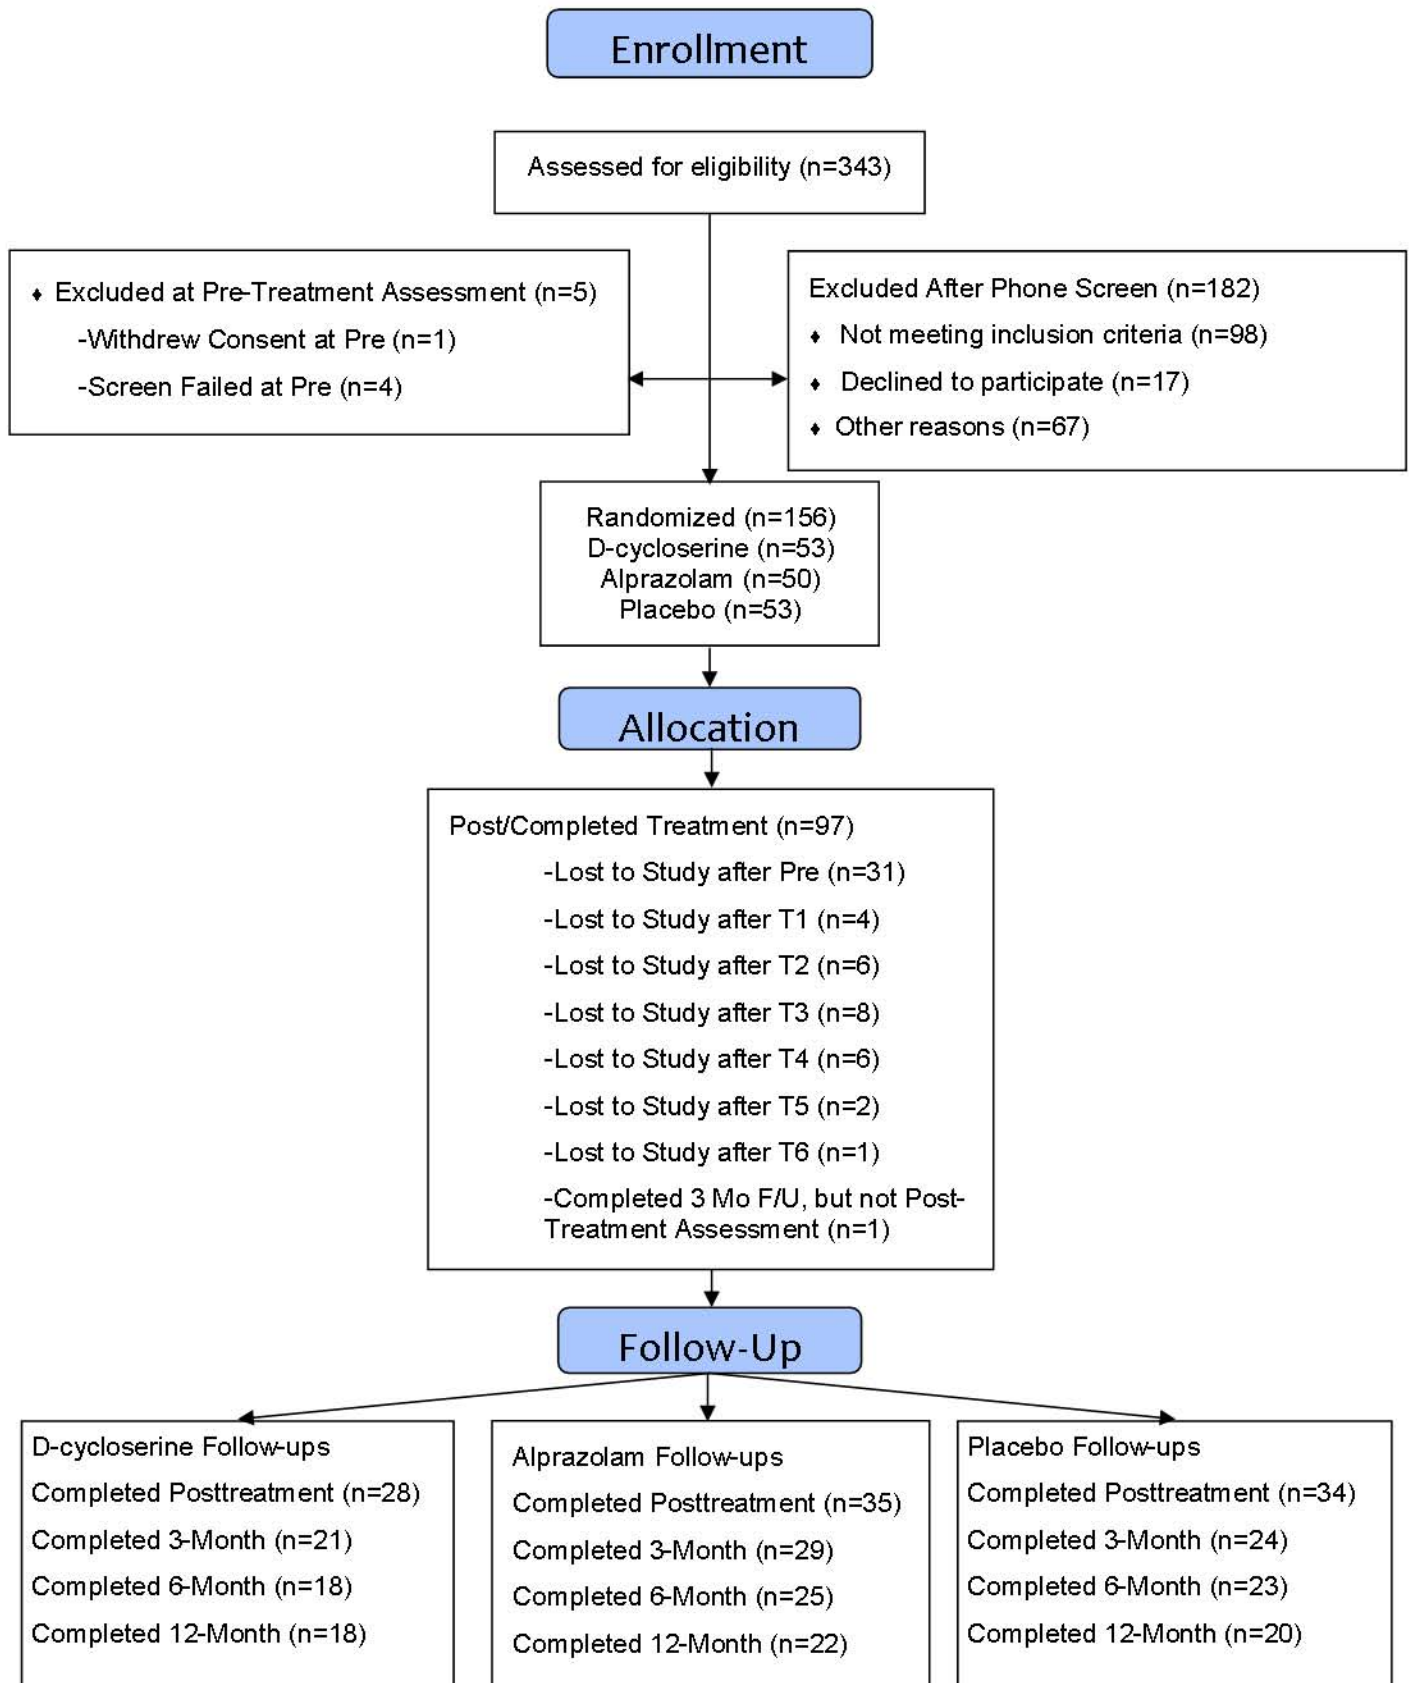

Supplement: 640_ds001.pdf [file 640_ds001.pdf]
